# Supplementary material
Source: HighWire-hosted journal article supplement (https://bmjopen.bmj.com/content/6/10/e011067)
Supplement: inline-supplementary-material-1 [file inline-supplementary-material-1.pdf]

Supplementary Figure 1: Details of compliance to ERAS protocol: pre-, intra- and post-operative compliance

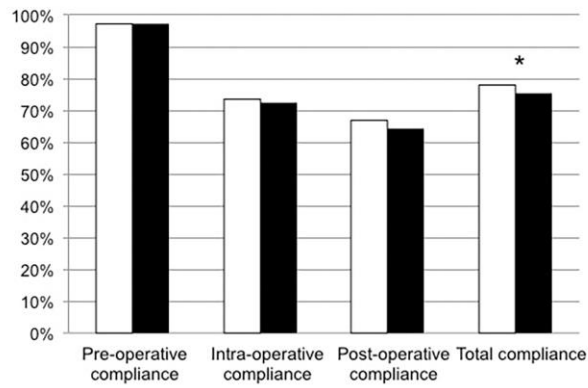

\*  $p < 0.05$
